# Accurate detection of low-level somatic mutations with technical replication for next-generation sequencing

Junho Kim<sup>1</sup>, Dachan Kim<sup>1</sup>, Jae Seok Lim<sup>2</sup>, Ju Heon Maeng<sup>1</sup>, Hyeonju Son<sup>1</sup>, Hoon-Chul Kang<sup>3</sup>, Hojung Nam<sup>4</sup>, Jeong Ho Lee<sup>2,\*</sup> and Sangwoo Kim<sup>1,\*</sup>

<sup>1</sup> Severance Biomedical Science Institute, Yonsei University College of Medicine, Seoul 03722, South Korea

<sup>2</sup> Graduate School of Medical Science and Engineering, KAIST, Daejeon 34141, South Korea

<sup>3</sup> Division of Pediatric Neurology, Department of Pediatrics, Pediatric Epilepsy Clinics, Severance Children's Hospital, Epilepsy Research Institute, Yonsei University College of Medicine, Seoul 03722, South Korea

<sup>4</sup> School of Electrical Engineering and Computer Science, Gwangju Institute of Science and Technology, Gwangju 61005, South Korea

\*to whom correspondence should be addressed: Jeong Ho Lee ([jhlee4246@kaist.ac.kr](mailto:jhlee4246@kaist.ac.kr)) or Sangwoo Kim ([swkim@yuhs.ac](mailto:swkim@yuhs.ac))

## ABSTRACT

Accurate genome-wide detection of somatic mutations with low variant allele frequency (VAF, <1%) has proven difficult, for which generalized, scalable methods are lacking. Herein, we describe a new computational method, called RePlow that we developed to detect low-VAF somatic mutations based on simple, library-level replicates for next-generation sequencing on any platform. Through joint analysis of replicates, RePlow is able to remove prevailing background errors in next-generation sequencing analysis, facilitating remarkable improvement in the detection accuracy for low-VAF somatic mutations (up to ~99% reduction in false positives). The method was validated in independent cancer panel and brain tissue sequencing data. Our study suggests a new paradigm with which to exploit an overwhelming abundance of sequencing data for accurate variant detection.

## INTRODUCTION

Next-generation sequencing (NGS) has afforded researchers the means with which to investigate somatic variants with tremendous accuracy. For many years, the usefulness of NGS was highlighted in cancer research, wherein mutations are clonally expanded and shared by the majority of cancer cells, thereby providing a sufficient variant allele frequency (VAF) that can be detected in a sample. However, recent applications of genome analysis, such as in liquid biopsy<sup>1</sup>, non-invasive prenatal testing<sup>2</sup>, somatic mosaicism<sup>3</sup>, tumor subclones<sup>4</sup> and cell lineage tracing<sup>5</sup>, are fraught with somatic single nucleotide variants (SNVs) that exist at low VAF. Accurate detection of these SNVs may prove to be the key to further expanding the use of NGS in biomedical research.

Detection of low-VAF somatic mutations is a challenge in conventional NGS. Even at a high read depth, NGS shows a rapid drop in detection accuracy of low-VAF somatic mutations<sup>6-8</sup>. Attempts to address this issue have mainly focused on modifying sequencing protocols, such as tagging unique molecular identifiers<sup>9,10</sup>, generation of tandem-copies<sup>11</sup>, adding DNA-repair enzymes<sup>12</sup>, and selection of mutation-harboring subsamples (e.g., single-cell sequencing<sup>13</sup>). The common aim of these methods is to enhance signal-to-noise ratios by amplifying mutation-driven variant alleles while discriminating erroneous alterations in non-mutation sites: the majority of these errors are believed to originate from external DNA damage<sup>14,15</sup>, which has been found to pervasively confound variant identification in genome re-sequencing projects<sup>12</sup>. While technical advances that seek to reduce these errors are important, a more general and sustainable approach is required to accelerate practical application of conventional NGS data.

In science, one of the key processes through which to yield accurate and reliable data is measurement of replicates. Unlike other biological experiments, however, NGS for variant detection has been granted an exemption from experimental replication, mostly due to costs and a lack of analysis methods<sup>16</sup>. As NGS is rapidly diminishing in cost, we suspect that the use of replication could provide a general, efficient, and widely applicable means by which to detect rare but biologically important somatic variants.

We have developed a new probabilistic model (named RePlow) that jointly analyzes library-level replicates for accurate detection of low-VAF somatic mutations. Importantly, the method is platform independent. Given sequencing data, RePlow infers patterns of background errors intrinsic to a data set. According to these inferred error profiles, variants are called by identifying mismatched alleles for all replicates simultaneously. Compared to a single-sample-based variant calling, RePlow showed marked improvement in both sensitivity and specificity. Furthermore, we were able to confirm the accuracy of our model in independent cancer panels and to discover low-VAF variants ( $\sim 0.5\%$ ) that could not be detected with conventional brain tissue sequencing. Our model demonstrates that exploiting replicates can be a cost-effective, scalable, and sustainable solution for detecting low-level somatic mutations, which has continued to remain elusive.

## RESULTS

### The current state of calling low-VAF somatic mutations

First, we sought to examine the *bona fide* accuracy of current conventional NGS techniques and algorithms in calling low-VAF somatic mutations. We prepared a test-base data set for the measurement (**Fig. 1a**). Unlike *in silico* simulations, directly pooled genomic materials reflect the variety of errors across the entire sequencing step. Thus, genomic DNA from two independent blood samples was mixed to mimic somatic mutations at four different VAFs: 0.5%, 1%, 5%, and 10% (designated as samples A, B, C, and D, respectively). Sequencing of the material provided a set of control positives (645 true variants) and negatives (66,485 non-variant sites) for determining detection accuracy, including sensitivity and false positive rate (FPR). The test-base data set consisted of library- and sequencing-level replicates for three distinct platforms: hybridization-capture-based Illumina sequencing (ILH, up to 1,000x) and amplicon-based Illumina and Ion-Torrent sequencing (ILA and ITA, respectively, up to 10,000x) (see Methods). The sequencing data sets were further downsampled by an interval of 100x (ILH) or 1,000x (ILA and ITA) to investigate the effect of read depths (**Supplementary Table 1**).

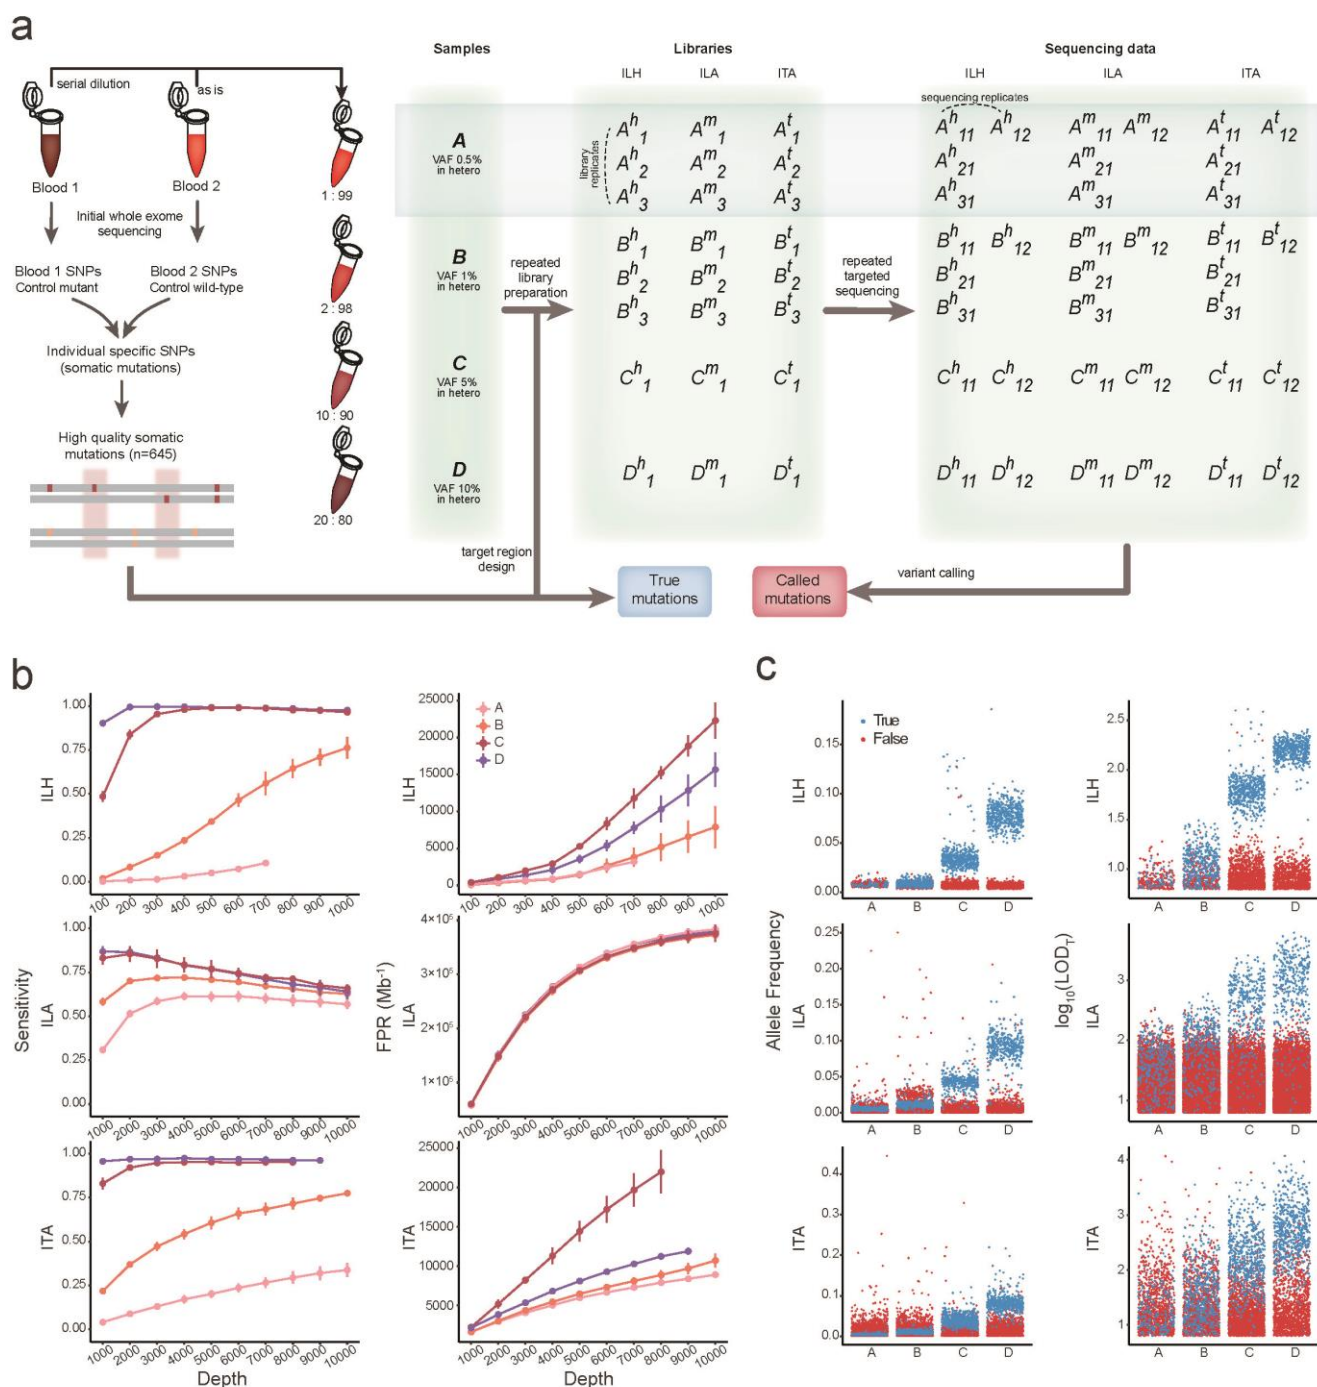

**Figure 1. Assessment of conventional algorithms for detecting mutations with low allele frequency.** (a) Schematic of experimental design for test-base sequencing data. Four distinct sample mixtures (A, B, C, and D) were prepared and sequenced with three different sequencing platforms (ILH, ILA, and ITA). Constructed libraries from each platform were sequenced twice to produce sequencing replicates ( $X_{11}$  and  $X_{12}$ ). For samples A and B, two independent sets of sequencing library were additionally prepared to sequence data from library replicates ( $X_{21}$  and  $X_{31}$ ). Each set of sequencing data was sequentially downsampled ten times to evaluate the effects of read depth. All generated datasets were analyzed, and average performances were reported for each depth and platform. (b) Sensitivity and FPR of conventional methods (MuTect, others in Supplementary Fig. 1) by sequencing depth and VAF for each sequencing platform. Points are depicted within the maximum depth of the sequencing data (Supplementary Table 1). Error bars, 95% confidence intervals. (c) Distribution of allele frequencies and probabilistic odd-ratio scores ( $LOD_T$ ) for true positive and false positive calls for each sample mixture (colored by blue and red, respectively). ILH, hybrid-capture-based Illumina sequencing; ILA, amplicon-based Illumina sequencing; ITA, amplicon-based Ion Torrent sequencing; VAF, variant allele frequency; FPR, false positive rate.

The feasibility of detecting low-*VAF* variants with three of the most commonly used somatic variant callers was evaluated on the test-base data<sup>17-19</sup>. In their near-default settings (disabled coverage limit), all callers lost most of the variants in samples A and B (**Supplementary Fig. 1**). Additional parameter optimizations (including tumor-cellularity, see Methods) enabled detection of the lost variants but was accompanied by a tremendous increase in false positive calls (7~400k per Mb, **Fig. 1b** and **Supplementary Fig. 1**). While increasing the read depth generally improved the sensitivity, it did not enhance the overall performance of the callers due to large increases in FPRs. We noted a remarkably higher FPR for ILA, in which targeted genomic regions are covered by a smaller number of amplicons, compared to ITA, thus requiring more PCR cycles for library preparation: PCR generates DNA damage, leading to errors in sequencing. In such an environment, high depth sequencing can even lower sensitivity (**Fig. 1b** left). We found that most of the false negative calls in high depth ILA were triallelic, caused by the accumulation of errors at true variant sites (**Supplementary Fig. 2**).

The allele frequency distributions of the true and false calls in the test-base data set confirmed the intractability of current forms of sequencing data analysis. We found a consistent level of background errors (1-3%) in all three platforms (higher in amplicon sequencing) that dominated true signals at a *VAF* of  $\leq 1\%$  (**Fig. 1c**). Accordingly, additional filtering with a hard *VAF* cut-off value was unable to separate erroneous variants. Likewise, the distributions of probabilistic odd-ratio scores ( $\text{LOD}_T$  score<sup>19</sup>) severely overlapped between mutations and errors (**Fig. 1c** right). Moreover, none of the commonly used features for variant filtration, such as base call quality, mapping quality, number of per-read mismatches, and indel proximity, were able to mitigate the problem (**Supplementary Fig. 3**). These results refute previous perspectives that suggest errors can be distinguished from true low-level mutations through stringent filters<sup>12,16</sup>.

### Using replicates: primitive models

The NGS sequencing process can be divided into three steps: 1) sample preparation, 2) library

preparation, and 3) sequencing, each of which can generate genuine errors (**Fig. 2a**). For example, sample contamination, PCR amplification error, and overlapping fluorescence signals are frequently observed errors in each respective step<sup>16</sup>. Technical replication aims to measure the variance of these errors between data sets. However, said measurement is limited by the time of the replication, because errors generated in preceding steps will be shared in all following replicates. Thus, repeated sequencing of the same libraries or a collection of sequencing reads does not provide any information concerning PCR errors or DNA damage. Accordingly, we referred to library-level replicates as proper technical replicates in this study.

In the absence of systematic methods, two primitive approaches can be implemented to test the effect of replication on detecting low-*VOF* variants: intersection and BAM-merge (**Fig. 2b** and Methods). The intersection model is based on the reproducibility of variants. Thus, only variants that are called in every replicate are finally reported. The intersection model can be seen as the conventional “call-and-validate” strategy, where initial candidate variants undergo independent validation in subsequent data sets. In the BAM-merge model, alignment files (BAM files) from all replicates are merged to a single file and fed into a caller. In both models, the expected benefits rely on an assumption of error randomness: ideally, true mutation signals will accumulate, and errors will be dispersed (**Fig. 2b** upper).

In the present study, we found that both models only provided mediocre improvement above conventional single-sample-based variant calling (**Fig. 2c**). The intersection model substantially lowered sensitivity, as was expected. Moreover, it failed to effectively reduce *FPRs* in two amplicon-based platforms (ILA and ITA in **Fig. 2c** green lines, and **Supplementary Fig. 4**). While the BAM-merge model substantially increased sensitivity in two platforms (ILH and ITA), it generated a troubling number of false positives in all platforms (blue lines, **Fig. 2c** and **Supplementary Fig. 4**). Unlike the ideal condition, we noted two critical factors as sources of these inefficiencies (**Fig 2b** lower). First, the overall amount of background errors was higher than expected, affecting a wide range of genomic positions. This suggested that replicates of non-variant sites were being called as



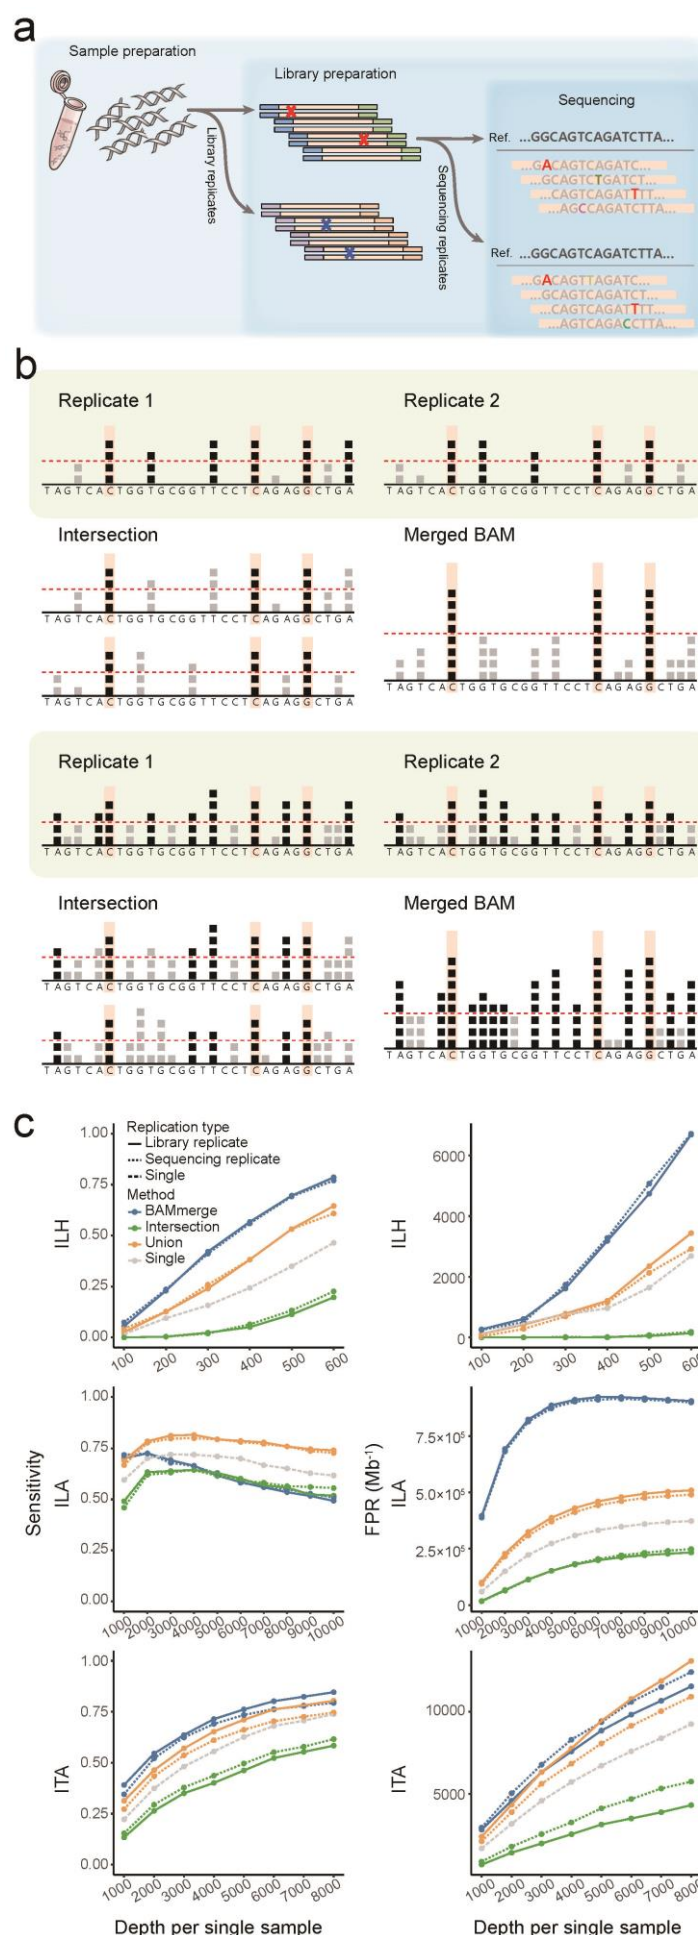

**Figure 2. Use of replicates with primitive models.** (a) Experimental steps in the typical NGS process. Errors can be generated at each step. Note that background errors in the library preparation step (red marks and bases) cannot be discriminated with the sequencing replicates (pseudo-replicates). (b) Description of primitive approaches (intersection and BAM-merge) with their expected (upper) and real (lower) effects. Each square represents an observed B allele for a given position. Positions with a number of B alleles beyond the detection threshold (red dashed line) are called as mutation candidates (positions with black squares). Both approaches are expected to discriminate true variants (orange-shaded positions) from false calls based on the randomness of error (upper). However, in real high-depth data, both approaches are ineffective due to excessive background errors (lower). (c) Sensitivity and FPR of the primitive approaches with sample B (1% VAF) for each platform. Primitive approaches were applied for both library (solid lines) and sequencing (dotted lines) duplicates. Calls from the single sample (dashed lines) are also depicted to evaluate the improvement with replicates. All mutation calls were made by MuTect.

true variants (**Supplementary Fig. 5**). Second, merging BAM files increased the read depth and lowered the VAF threshold with which to achieve probabilistic significance, promoting false positives (**Fig. 2b**, lower right). The combined effects of background errors and a higher read depth elicited extremely complex model behavior: for example, the FPR in the BAM-merge model for ILA starts to decrease from 6,000x coverage (**Fig. 2c** middle right panel), as more than two different erroneous alleles begin to accumulate to form a triallelic site in the false positive sites (**Supplementary Fig. 6**). We confirmed that background errors cannot be separated with mere use of replication. Additionally, the results showed that the primitive models do not differentiate library-level replicates from those at the sequencing level (**Fig. 2c**, dotted lines), which implies the improper use of technical replicates. Therefore, more sophisticated approaches are needed to overcome these challenges.

### Using replicates: the RePlow model

To make better use of replication in NGS data analysis, we developed RePlow, a new model that jointly analyzes library-level replicates to call low-VAF somatic mutations in a data set. In an attempt to address the challenges stated above, our primary goal for the method was to achieve robust discrimination of background errors based on repeated observations. To achieve the goal, we designed the model to infer a probability distribution of background errors in each replicate, relying on the given raw data (“on-the-fly manner”), so as not to lose generality. Final variant calling is conducted according to merged probabilities among replicates, reflecting the concordance of mismatched allele compositions.

For the on-the-fly error profiling, we devised a strategy that measures the amount of mismatched alleles in alignment caused by background errors, the Mismatch Overrepresentation Score (MOS, see Methods). In conventional models, the cause of mismatches is regarded as either 1) the presence of variants or 2) sequencing errors in uniquely mapped regions. The expected amount of sequencing errors can be calculated from the collection of base-call quality scores in mapped reads. Thereby, an



unexpectedly large number of mismatches (e.g., high VAF in high quality reads) is directly interpreted as the presence of true variants. In designing RePlow, we considered background errors as additional causes for mismatches that distort the distribution of mismatches but are not recognized by the base-call quality. Briefly, MOS scores are calculated by the discrepancy between the expected and the observed amount of mismatches to construct the probability distribution functions (PDFs) of a background error-induced VAF. We presumed that sampling MOS scores in a large number of non-variant sites (e.g., >10,000 base pairs) with high-quality alignment scores could profile sample-specific background errors (see Methods).

Calculation of MOS scores on a matched control sample (variant-free) in the test-base data set identified patterns and the levels of background errors generated for the three platforms, each of which showed a genuine signature (**Fig. 3a**). The overall error levels were higher for the amplicon-based platforms (ILA and ITA) than the hybrid-capture platform (ILH). Additionally, the error levels were specific to the sequence context. We noted excessive background errors in A>G (T>C) and C>T (G>A) transitions for ILA, which is considered a signature of PCR error during library amplification<sup>20</sup>. Meanwhile, ILH data contained a higher level of C>A (G>T) substitutions, a well-known artifact caused by DNA oxidation during the hybrid-capture specific sonication process<sup>15</sup>. The inferred context-specific background error profiles were also consistent with the biased patterns of observed VAFs at non-mutant sites in the test-base data set (**Fig. 3b**, red dots), which supports that the major source of erroneous variant calling comes from intractable background errors, not controllable base-call errors (e.g., by removing low quality reads). Using the distribution of MOS scores from every sampled position, we attempted to construct PDFs for two random variables: i) VAFs acquired as background errors and ii) the sequence context (**Fig. 3c**). Since no canonical probability distribution is known for NGS background errors, we drew the empirical cumulative distributions for each substitution type and fit them to an exponential distribution (see Methods). In doing so, we confirmed that the inferred distributions (red lines) closely approximated their true distributions (black lines).

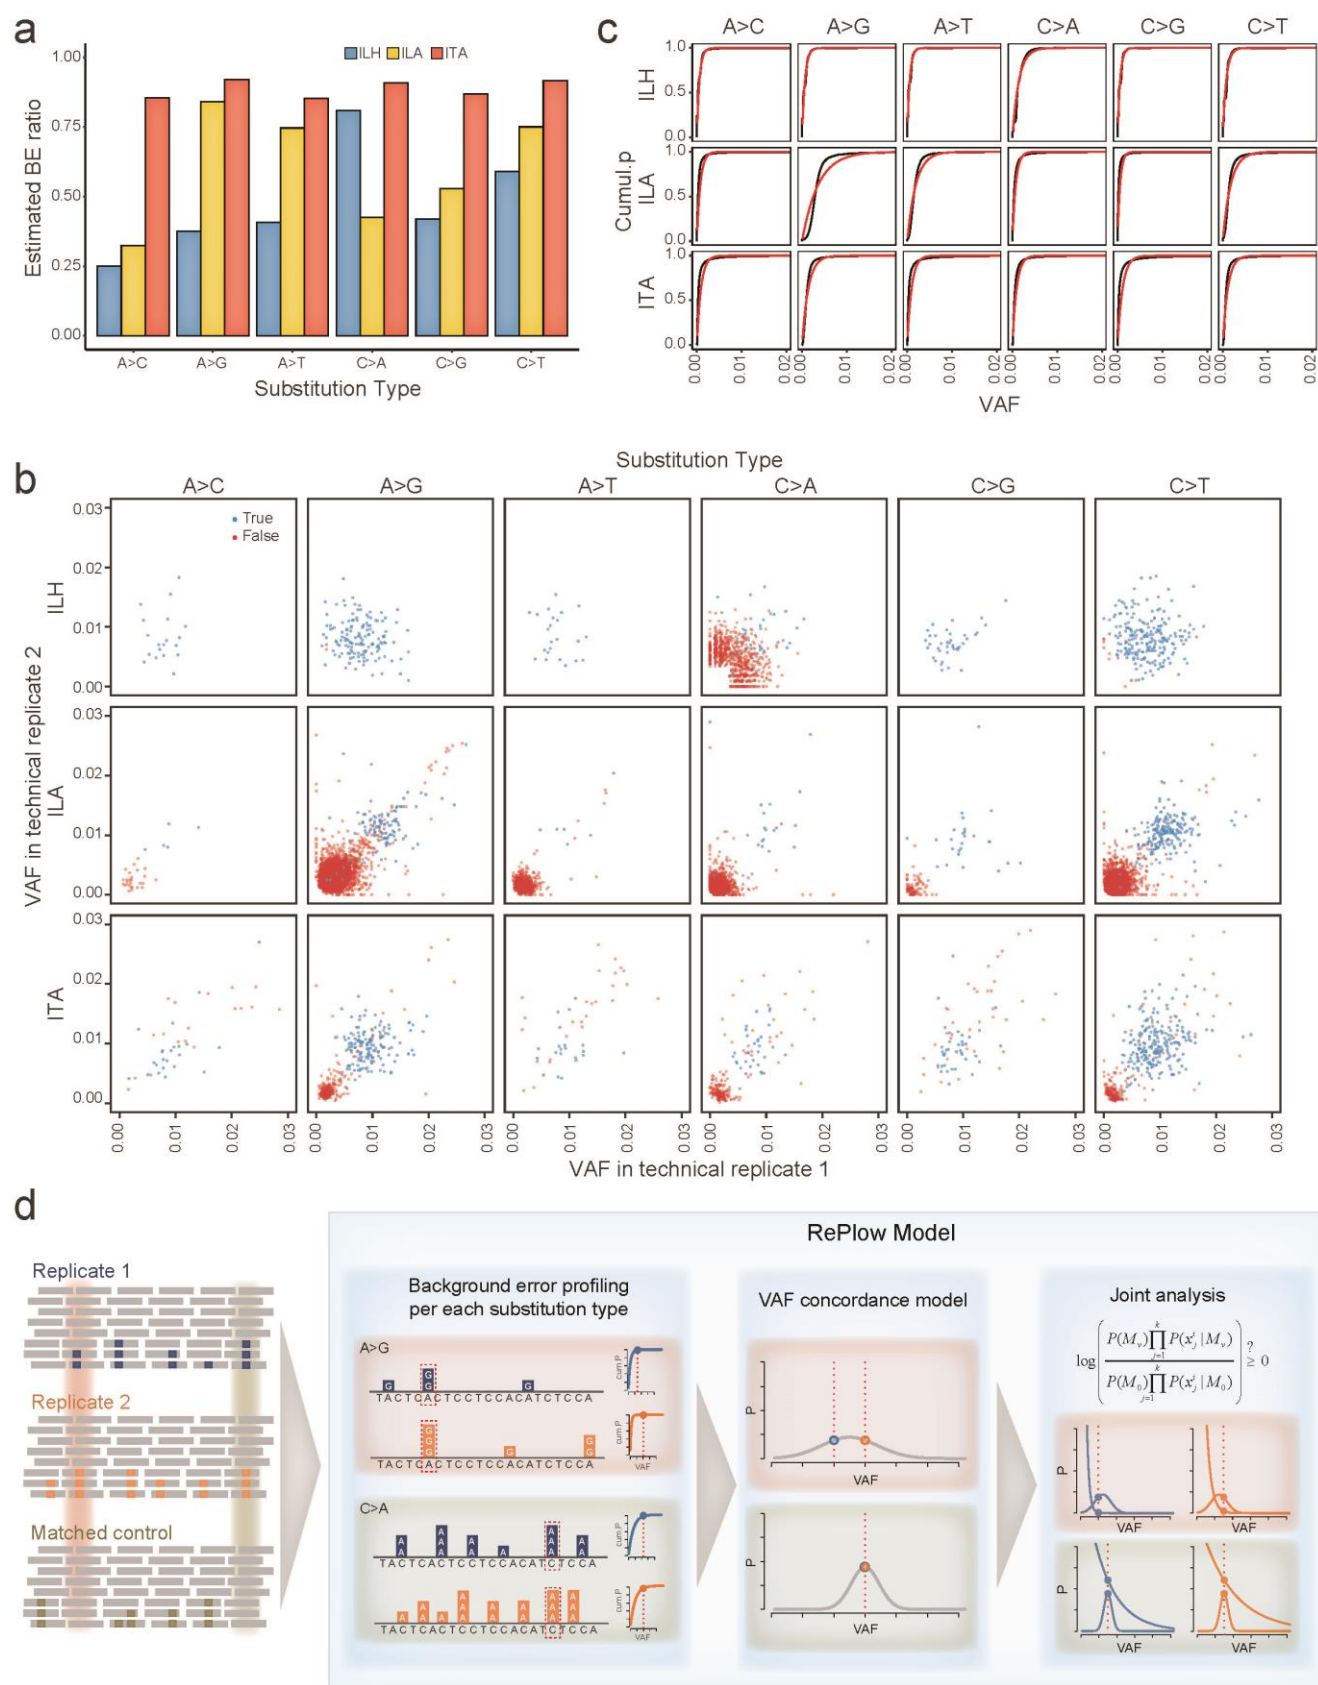

**Figure 3. Development of the RePloW model.** (a) The estimated proportion of background errors (BEs) from total mismatches by substitution type. MOS values were measured for each substitution type from total mismatches of matched control samples. Positions with germline variants were excluded to assume that all mismatches originated from either sequencing or background errors. The ratio of the sum of MOS scores to the total mismatch count is regarded as an estimate of the BE proportion. (b) VAF distribution of called mutation candidates from library replicates of sample B (1% VAF) for each platform. All candidates were called by MuTect in at least one replicate. True positive and false positive calls are colored in blue and red, respectively. (c) Empirical and fitted cumulative distribution for the VAFs of background

errors. To estimate the PDF of background errors, VAF profiles based on the MOS value of each position (empirical cumulative distribution, black lines) were constructed and fitted by cumulative exponential distribution (red lines) (see methods). PDFs were then constructed for each substitution type with the estimated parameter of the cumulative exponential model. (d) Overview and examples of mutation detection by RePlow. Mapped sequencing data of replicates and matched control are taken as input. For each data set, VAF profiles of background errors per substitution type are constructed first to estimate the PDF. Then, each genomic position is analyzed to calculate probabilities of being a variant or an error using estimated concordance models with the average VAF (normal distribution) and background error profiles (exponential distribution), respectively (see Methods). Both probabilities are jointly analyzed to estimate the likelihood thereof in a sequence context. Sites with a C>A mutation (green-shaded area) show a higher probability of being a variant than A>G mutation sites (red-shaded area) based on their higher VAF and better concordance in both replicates. However, due to the excessive occurrence of context-specific error (C>A), RePlow selects only the A>G mutation site as a final candidate. MOS, mismatch over-representation score; PDF, Probability density function.

The VAF distribution of the test-base samples (**Fig. 3b**) provided two important justifications for using replicates: 1) true and false mutations become more separable in a higher dimension (in contrast to a single data set, **Fig. 1c**), and 2) VAFs of true variants are more concordant in replicates (blue vs. red dots in **Fig. 3b**). RePlow implements a probabilistic model with which to quantify these two features, based on a general number of replicates (**Fig. 3d**). Briefly, RePlow calculates the probabilities of being a true variant and an error for a given position in every replicate. The probability of error is estimated by the inferred sample-specific PDF, while the probability of variant is estimated by binomial approximation with the averaged VAFs, which evaluates the concordance between replicates (see Methods). Both probabilities are jointly analyzed to estimate the likelihood of a true variant in a sequence context (**Fig. 3d**). Sites that have a higher probability being a variant than an error are then treated with post filters to eliminate systematic errors that are not captured by the error model (Supplementary Methods). Passing sites are finally considered as variant candidates.

## Variant detection with RePlow

We tested RePlow on the test-base data to compare its performance with single and the primitive replication models (**Fig. 4a**, 1% VAF is shown). Note that a common RePlow model was applied to the three different platforms (ILH, ILA, and ITA) without any platform-specific adjustments. The most prominent improvement achieved with RePlow was a remarkable drop in FPRs (298.1, 6069.6,

and 329.8 Mb<sup>-1</sup> for ILH, ILA, and ITA, respectively, red lines in **Fig. 4a**), reductions of 70.2%, 97.5%, and 94.4% compared to the most precise primitive model (intersection, green lines) and reductions of 96.2%, 98.4%, and 96.9% compared to the single sample calling. Moreover, the reductions in FPR were achieved without a loss of sensitivity, comparable to that with union or BAM-merge modeling (orange and blue lines). These overall improvements led to outstanding performance for RePLOW in a balanced measure (F-score). Similarly, RePLOW achieved the highest accuracy at a lower VAF (sample A, 0.5%) for a minimum read depth of >400x (**Supplementary Fig. 7**). Application to triplicates increased the model accuracy even more, especially in terms of sensitivity, although there was a decrease in precision for ILA (**Supplementary Fig. 8 and 9**).

Cross-platform replication is a widely used validation method (e.g., initial calling in ILH and validation in ILA). Being platform independent, RePLOW can be applied to any combination of replicates generated by multiple platforms. Accordingly, we sought to test the *bona fide* effects of such validation scenarios of the three platforms in pairs and in comparison to RePLOW (**Fig. 4b**). Although high precision supports the reliability of cross-platform validated variants, a significant loss of true low VAF mutations was observed (sensitivities of 47.1%, 57.8%, and 49.3% for ILH×ILA, ILH×ITA, and ILA×ITA pairs, respectively). Meanwhile, we found that joint analysis of replicates using RePLOW was superior to the cross-platform validation approach, increasing sensitivities by more than 20% (75.8%, 78.5%, and 68.0% in the same order of pairs) while maintaining high precision (**Fig. 4b**, red vs. green bars). These results indicated that many low-level mutations are falsely rejected by the current validation method, a substantial portion of which can be rescued by RePLOW.

Next, we applied RePLOW to an independent dataset. A commercial reference standard with 35 cancer hotspot SNVs with VAFs of 1.0-1.3% was prepared and sequenced using two widely-used cancer panels (Illumina SureSelect- and Ion AmpliSeq-based, see Methods for details) in up to triplicates (**Fig. 4c** and **Supplementary Table 2**). We found that both the single and the primitive replication models failed to detect ~10 true mutations, especially those at triallelic sites, most of



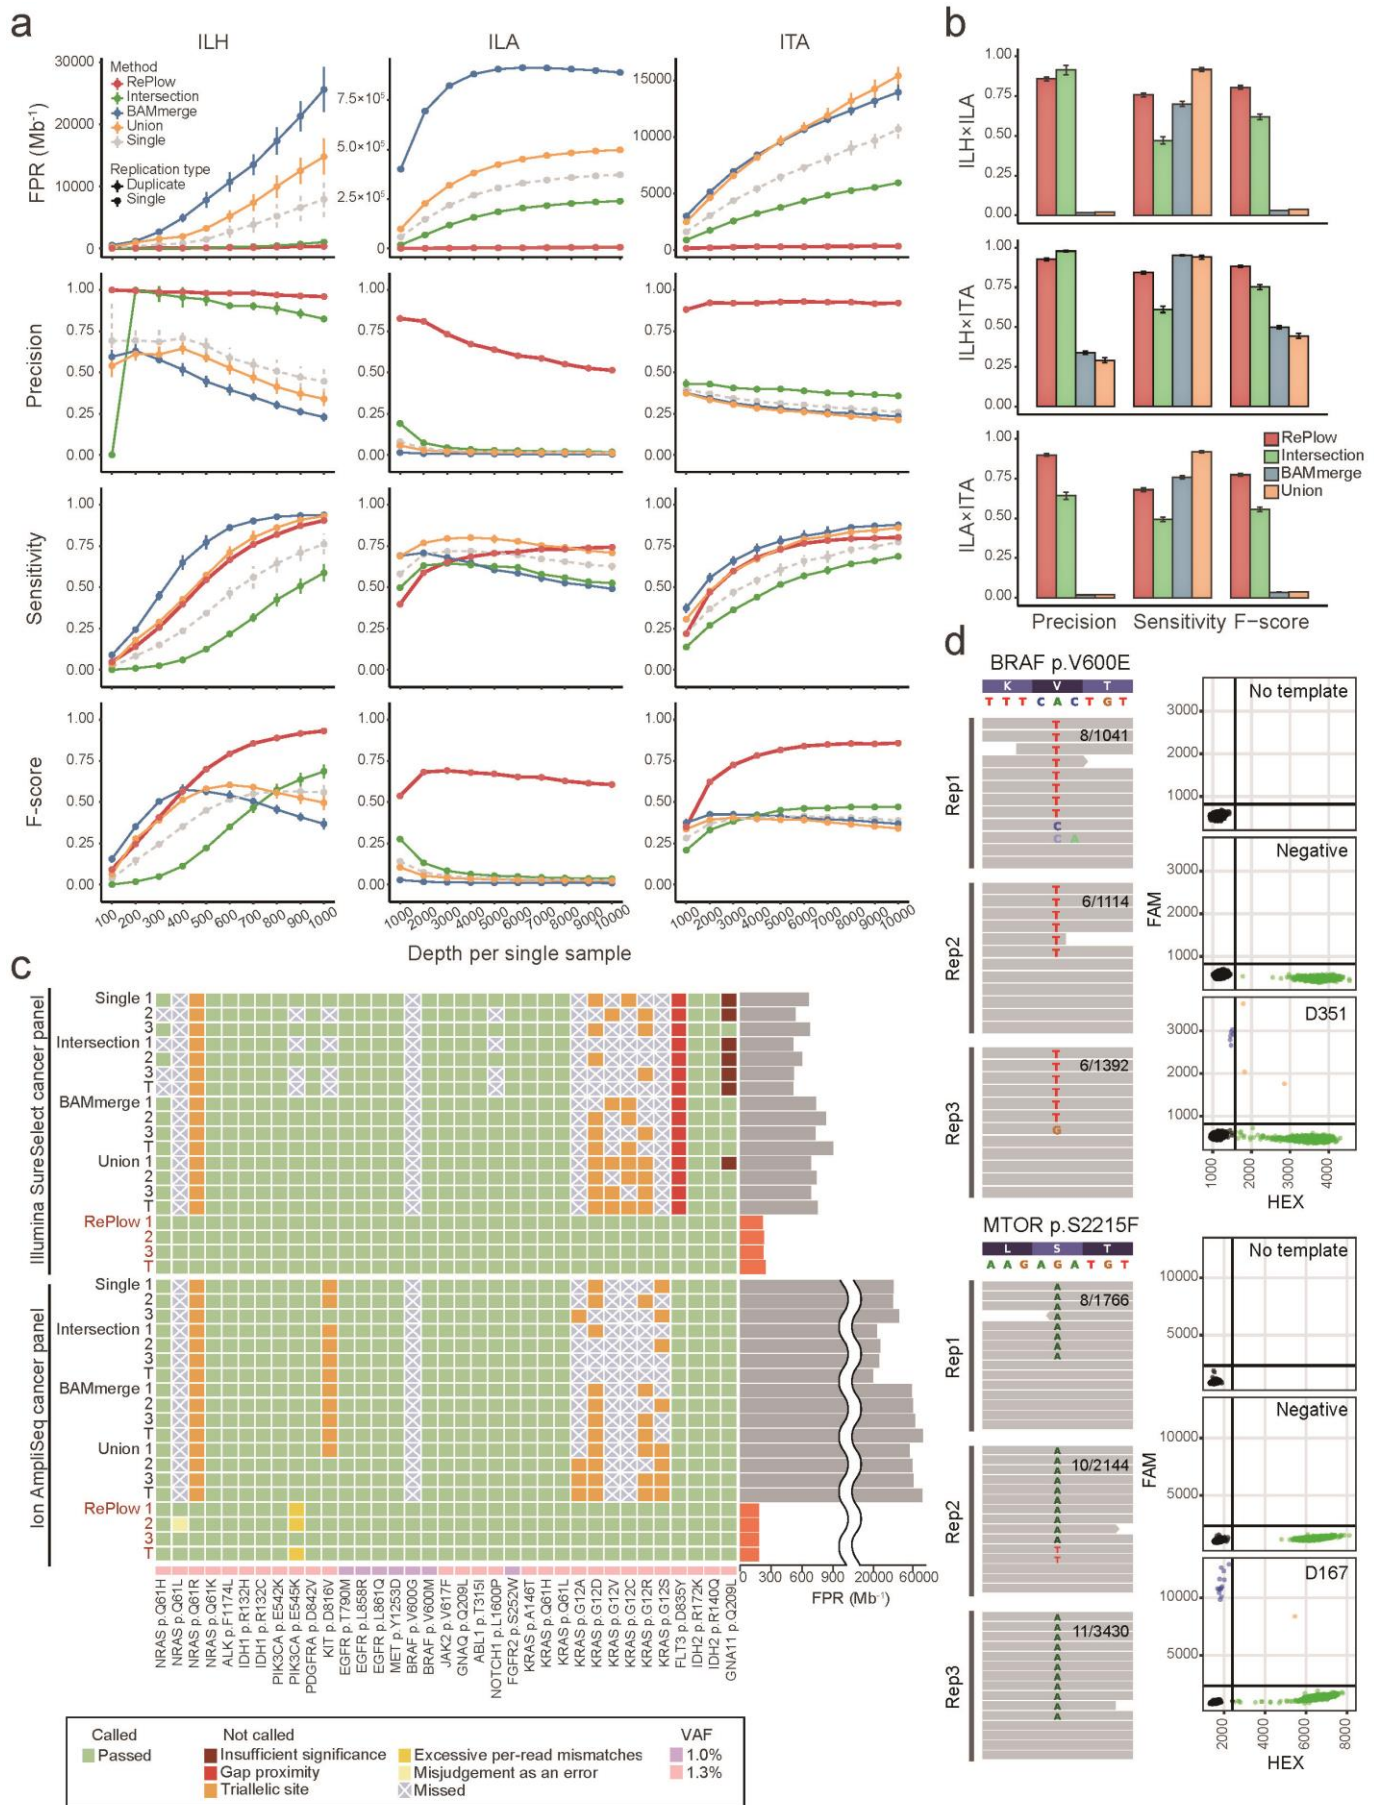



the data sets with the highest depth of each platform were used for the combination (1,000x for ILH and 10,000x for ILA and ITA). Error bars, 95% confidence intervals. (c) Independent assessment with a reference material sequenced by typical cancer panels. Detection of 35 true cancer hotspot SNVs (1-1.3% VAF) were tested for all combinations of library triplicates ( $X_1X_2$ ,  $X_2X_3$ ,  $X_1X_3$ , and  $X_1X_2X_3$  are denoted as 1, 2, 3, and T, respectively). Green shading means a correct detection, and other colors represent the reason for the rejection or no detection (with X marks). FPRs of RePlow are highlighted in orange to emphasize their reductions therein, compared to other primitive approaches. (d) Experimental validation of rescued low-level mutations from the samples negative for pathogenic mutations in previous analysis. Observed allele counts are described in each replicate (left). Droplet digital PCR results for no DNA template (No template), DNA from healthy controls (negative), and disease samples are shown together for each site (right). Green and blue dots represent wild type- and mutant-specific signals, respectively.

which were successfully called by RePlow. The FPRs of the conventional models varied across platforms, from 600 to 60,000 Mb<sup>-1</sup> (higher in Ion AmpliSeq). However, RePlow showed reduced FPRs of 180-250 Mb<sup>-1</sup>, including a 99.24% reduction in FPR for Ion AmpliSeq. These results confirmed the general applicability of RePlow. As false positivity in clinical multi-gene tests is as devastating as false negativity, library-level replication can be considered as an efficient approach, providing a drastic gain in specificity with only a relatively small increase in cost.

Finally, we applied RePlow to real disease data, attempting to identify disease-associated or -causing somatic mutations with low allelic frequency that might have been missed in a singleton of deep sequencing. Recently, childhood intractable epilepsy with focal cortical dysplasia or low-grade tumor (e.g., ganglioglioma) has been reported as being caused by low-level somatic mutations in *MTOR* or *BRAF*<sup>3,21,22</sup>. Importantly, a somatic mutational burden of even ~1% in the focal brain has been deemed sufficient to cause intractable epilepsy<sup>3,23</sup>. We obtained specimens from three intractable epilepsy patients with matched brain-peripheral (e.g. blood or saliva) tissue found to be negative for any pathogenic mutations in a singleton of deep targeted sequencing of *MTOR*, *BRAF*, and other related genes. We performed two additional replications in brain tissues from these mutation-negative patients. In result, a total of 11 mutation candidates were called by RePlow, compared to only two candidates called by the intersection method that did not overlap at all. Among the 11 mutation candidates called by RePlow, novel missense mutations in *MTOR* (p.S2215F) and *BRAF* (p.V600E) were previously reported as disease-associated or -causing mutations<sup>3,21,24-27</sup>. Accordingly, these two mutations were selected for experimental validation with droplet digital PCR; both were successfully validated (**Fig. 4d**). The two mutations showed extremely low VAFs in sequencing data

(0.77% and 0.45% on average) and, therefore, were called only if all triplicates were applied together to achieve a high enough level of significance. Taken together, these results support the use of our RePlow model allow for more accurate detection of low-level somatic mutations via replication of conventional NGS.

## DISCUSSION

Rapid advances in DNA sequencing technology have helped reduce the costs of sequencing at a rate that outpaces Moore's law. For the last 10 years, sequencing costs have declined by a factor of ~10,000, a trend that is expected to continue. Every one year, researchers can generate sequencing data at a 1.5~4 times higher throughput at the same cost. Overall, the general consensus is that the cost of sequencing itself will no longer act as a bottleneck to genome research in the near future<sup>28</sup>. Nevertheless, merely increasing the numbers of a sample is not an ultimate solution to attaining research objectives, such as discovery of cancer driver mutations, which is already approaching a plateau<sup>29</sup>. At this point, we need to scrutinize the directions to which lower costs for DNA sequencing provide actual research benefits beyond sample size or read depth. We suggest that replication will prove useful to traversing the current limits of variant detection, facilitating robust identification of low-level somatic mutations.

We would like to note that the use of replication is not substitutive for or mutually exclusive with other technologies for detecting low-level somatic mutations. What we have described in this study is not merely a specific method, moreso a paradigm for adding a new dimension to the current methods of mutation calling by which previously unquantifiable background errors in pre-sequencing steps can be profiled and undergo technical replication. As we have shown, RePlow can be applied to multiple platforms of completely different data characteristics without the need for *a priori* background error profiles. By virtue of its platform independence, RePlow should maintain the ability to improve the performance of mutation calling for upcoming sequencing technologies through replication. Moreover, the possibility remains for further modification of its calling

algorithm for wider application to non-conventional sequencing (e.g., single cell sequencing and barcoded sequencing).

## **ACKNOWLEDGEMENTS**

This research was supported by a grant from the Korea Health Technology R&D Project through the Korea Health Industry Development Institute (KHIDI), funded by the Ministry of Health & Welfare, Republic of Korea (grant number: HI15C1601, HI14C1324 and HI15C3143).

## **AUTHOR CONTRIBUTIONS**

J.K., J.H.L., and S.K. initiated the idea. J.K. and S.K. developed the method. J.K., D.C., J.H.M., H.S., H.N., and S.K. worked on data analysis and presentation. J.S.L. and J.H.L. prepared the material and conducted experimental validation. H.K. provided disease tissues. J.K., J.H.L., and S.K. prepared the manuscript. All authors read and approved the final manuscript.

## **COMPETING FINANCIAL INTERESTS**

The authors declare that they have no competing financial interests.

## REFERENCES

1. Newman, A.M. *et al.* An ultrasensitive method for quantitating circulating tumor DNA with broad patient coverage. *Nat Med* **20**, 548-54 (2014).
2. Dan, S. *et al.* Non-Invasive Prenatal Diagnosis of Lethal Skeletal Dysplasia by Targeted Capture Sequencing of Maternal Plasma. *PLOS ONE* **11**, e0159355 (2016).
3. Lim, J.S. *et al.* Brain somatic mutations in MTOR cause focal cortical dysplasia type II leading to intractable epilepsy. *Nat Med* **21**, 395-400 (2015).
4. Spence, J.M., Spence, J.P., Abumoussa, A. & Burack, W.R. Ultradeep analysis of tumor heterogeneity in regions of somatic hypermutation. *Genome Medicine* **7**, 24 (2015).
5. Carlson, C.A. *et al.* Decoding cell lineage from acquired mutations using arbitrary deep sequencing. *Nat Meth* **9**, 78-80 (2012).
6. Xu, H., DiCarlo, J., Satya, R.V., Peng, Q. & Wang, Y. Comparison of somatic mutation calling methods in amplicon and whole exome sequence data. *BMC Genomics* **15**, 244 (2014).
7. Stead, L.F., Sutton, K.M., Taylor, G.R., Quirke, P. & Rabbitts, P. Accurately identifying low-allelic fraction variants in single samples with next-generation sequencing: applications in tumor subclone resolution. *Hum Mutat* **34**, 1432-8 (2013).
8. Roberts, N.D. *et al.* A comparative analysis of algorithms for somatic SNV detection in cancer. *Bioinformatics* **29**, 2223-30 (2013).
9. Schmitt, M.W. *et al.* Detection of ultra-rare mutations by next-generation sequencing. *Proc Natl Acad Sci U S A* **109**, 14508-13 (2012).
10. Kinde, I., Wu, J., Papadopoulos, N., Kinzler, K.W. & Vogelstein, B. Detection and quantification of rare mutations with massively parallel sequencing. *Proceedings of the National Academy of Sciences* **108**, 9530-9535 (2011).
11. Lou, D.I. *et al.* High-throughput DNA sequencing errors are reduced by orders of magnitude using circle sequencing. *Proceedings of the National Academy of Sciences* **110**, 19872-19877 (2013).
12. Chen, L., Liu, P., Evans, T.C. & Ettwiller, L.M. DNA damage is a pervasive cause of sequencing

errors, directly confounding variant identification. *Science* **355**, 752-756 (2017).

13. Lodato, M.A. *et al.* Somatic mutation in single human neurons tracks developmental and transcriptional history. *Science* **350**, 94-8 (2015).
14. Do, H. & Dobrovic, A. Sequence Artifacts in DNA from Formalin-Fixed Tissues: Causes and Strategies for Minimization. *Clinical Chemistry* **61**, 64-71 (2015).
15. Costello, M. *et al.* Discovery and characterization of artifactual mutations in deep coverage targeted capture sequencing data due to oxidative DNA damage during sample preparation. *Nucleic Acids Res* **41**, e67 (2013).
16. Robasky, K., Lewis, N.E. & Church, G.M. The role of replicates for error mitigation in next-generation sequencing. *Nat Rev Genet* **15**, 56-62 (2014).
17. Koboldt, D.C. *et al.* VarScan 2: Somatic mutation and copy number alteration discovery in cancer by exome sequencing. *Genome Research* **22**, 568-576 (2012).
18. Saunders, C.T. *et al.* Strelka: accurate somatic small-variant calling from sequenced tumor-normal sample pairs. *Bioinformatics* **28**, 1811-1817 (2012).
19. Cibulskis, K. *et al.* Sensitive detection of somatic point mutations in impure and heterogeneous cancer samples. *Nat Biotechnol* **31**, 213-9 (2013).
20. Brodin, J. *et al.* PCR-induced transitions are the major source of error in cleaned ultra-deep pyrosequencing data. *PLoS One* **8**, e70388 (2013).
21. Nakashima, M. *et al.* Somatic Mutations in the MTOR gene cause focal cortical dysplasia type IIb. *Ann Neurol* **78**, 375-86 (2015).
22. Marucci, G. *et al.* Mutant BRAF in low-grade epilepsy-associated tumors and focal cortical dysplasia. *Ann Clin Transl Neurol* **1**, 130-4 (2014).
23. Lim, J.S. *et al.* Somatic Mutations in TSC1 and TSC2 Cause Focal Cortical Dysplasia. *Am J Hum Genet* **100**, 454-472 (2017).
24. Prabowo, A.S. *et al.* BRAF V600E mutation is associated with mTOR signaling activation in glioneuronal tumors. *Brain Pathol* **24**, 52-66 (2014).
25. Mirzaa, G.M. *et al.* Association of MTOR Mutations With Developmental Brain Disorders,



Including Megalencephaly, Focal Cortical Dysplasia, and Pigmentary Mosaicism. *JAMA Neurol* **73**, 836-45 (2016).

26. Moller, R.S. *et al.* Germline and somatic mutations in the MTOR gene in focal cortical dysplasia and epilepsy. *Neurol Genet* **2**, e118 (2016).
27. Schindler, G. *et al.* Analysis of BRAF V600E mutation in 1,320 nervous system tumors reveals high mutation frequencies in pleomorphic xanthoastrocytoma, ganglioglioma and extra-cerebellar pilocytic astrocytoma. *Acta Neuropathol* **121**, 397-405 (2011).
28. Sboner, A., Mu, X.J., Greenbaum, D., Auerbach, R.K. & Gerstein, M.B. The real cost of sequencing: higher than you think! *Genome Biology* **12**, 125 (2011).
29. Garraway, Levi A. & Lander, Eric S. Lessons from the Cancer Genome. *Cell* **153**, 17-37 (2013).
30. Koboldt, D.C., Larson, D.E. & Wilson, R.K. Using VarScan 2 for germline variant calling and somatic mutation detection. *Current protocols in bioinformatics*, 15.4. 1-15.4. 17 (2013).

## ONLINE METHODS

### Construction of a spike-in, test-base genome and generation of sequencing data

Spike-in, test-base data were prepared by mixing genomic DNA from two independent blood samples. Subsets of unique germline SNPs from one sample (reference alleles in another) served as an answer set of somatic mutations that have been found by variant callers. We first generated whole exome sequencing data (WES, ~400x coverage) of each sample to verify their genotypes and to select unique variants. Since we focused on measuring the accuracy of mutation callers according to changes in variant allele frequency (VAF), we only considered genomic regions with high mapping quality (average mapping quality  $\geq 58$  assessed by WES data of 1000 Genomes Project) to minimize the influence of mapping ambiguity for variant calling. We also restricted target regions to satisfy all following conditions for both samples to avoid the influence of other biases: (i) exons containing unique variants with a read depth  $\geq 20$ , (ii) indel-free exons, and (iii) exons containing clipped reads  $< 5$ . From those regions, only exons with unique heterozygous SNPs were selected to control the overall consistency of VAFs. A total of 645 unique variants from 564 exons were selected as an answer set for the spike-in data. To mimic mutations with different allele frequencies, four distinct mixtures were made by diluting samples at ratios of 0.01, 0.02, 0.1, and 0.2 to represent mutations with VAFs of 0.5%, 1%, 5%, and 10%. The samples were named A, B, C, and D, respectively (Fig. 1a). Intact blood gDNA from wild type sample served as a matched control.

Two different sequencing platforms, Illumina and Ion Torrent, were used to generate sequencing data for all mixture samples. For the Illumina platform, both hybridization-capture and amplicon-based sequencing were performed to compare the results of each library preparation method. As a result, all mixture data were sequenced through three different platforms: hybridization-capture-based Illumina sequencing (ILH), amplicon-based Illumina sequencing (ILA), and amplicon-based Ion Torrent sequencing (ITA). Agilent Sure Design online tools (<https://earray.chem.agilent.com/suredesign/>), Illumina design studio (<https://designstudio.illumina.com>), and Ion AmpliSeq Designer (<https://ampliseq.com/>) were used

to design custom probes that cover selected mutations for each sequencing platform. Since the target coverage of the designed probes differed for each platform, platform-specific answer sets were made that contained 513, 540, and 591 variants for ILH, ILA, and ITA, respectively. For ILH, samples were processed with target capture and library preparation according to Agilent's protocol and sequenced on an Illumina HiSeq 2000 sequencer (101x2 bp read length, ~1000x coverage). Samples with ILA followed the TruSeq preparation protocol and were sequenced on an Illumina HiSeq 2500 sequencer (151x2 bp read length, ~10,000x coverage). Ion Ampliseq protocol was carried out for ITA with an Ion Proton sequencer (125-275 bp amplicon range, ~10,000x coverage). All samples were sequenced twice from each constructed library; we called these data pairs as sequencing replicates ( $X_{11}$  and  $X_{12}$ ). For samples A and B (VAF 0.5% and 1%), two library replications (independent preparation of sequencing library from the same DNA sample,  $X_{21}$  and  $X_{31}$ ) were additionally performed for all sequencing platforms to compare differences in sequencing and library replication. All generated data were downsampled 10 times (100x to 1,000x for ILH and 1,000x to 10,000x for ILA and ITA) to track the detecting accuracy by sequencing depth. Details on the sequencing data and preprocessing procedures are described in Supplementary Table 1 and Supplementary Methods.

## **Assessment of variant calling accuracy with conventional algorithms**

We attempted to measure the conventional performance of variant calling, especially for variants with low frequency ( $\leq 1\%$ ). All generated data were analyzed by three popular variant callers: MuTect<sup>19</sup>, VarScan2<sup>17</sup>, and Strelka<sup>18</sup>. Default parameter settings were tested first for each method with minimal adjustments that disable the coverage limit. Tumor purity for VarScan2 was applied as 0.5, which is the recommended value for tumor samples with very low cellularity<sup>30</sup>. We considered calls with high confidence as test positive sets to assess the accuracy of MuTect and Strelka (KEEP judgment from MuTect and passed SNVs from Strelka). VarScan2 was evaluated with its raw SNV call results, because the high-confidence filter in VarScan2 (processSomatic) is fixed to filter out variants with VAFs $<0.1$ <sup>17</sup>. Compared with platform-specific answer sets, sensitivity and false positive rates

were measured for each data set.

Since all algorithms were not carefully designed for high-depth and amplicon-based sequencing data, calls with default parameters lost almost all true mutations with low frequency for all platforms (Supplementary Fig. 1). Thus, we adjusted parameters to recover those variant calls. For MuTect, count-based thresholds were released to prevent excessive filtration of high-depth data, although fraction-based ones for the same purpose were kept to maintain the intended uses. For example, we disabled `--max_alt_alleles_in_normal_count` (default 2), but held `--max_alt_allele_in_normal_fraction` at its default value (0.03), to discard unsuitable limits for high-depth data. For amplicon datasets, filters for strand bias and clustered positions were disabled, because of the nature of their generation. Parameters that fundamentally prevent variant calls with low frequency due to computational efficiency or suspected contamination were also disabled (Fig. 1b). For VarScan2, tumor purity was adjusted to 0.01, based on the actual cellularity of sample A. Through these adjustments, mutations at all mixture levels were successfully discovered (Supplementary Fig. 1). Adjusted results of Strelka were not reported, because the low-level mutations ( $VAF \leq 1\%$ ) were hardly detected, even after altering appropriate parameters. Detailed information for parameter adjustment is described in Supplementary Methods.

## RePlow model

### *Variant detection model*

Like other conventional callers, RePlow basically detects somatic variants by comparing the probability of two alternative models: a variant model ( $M_v$ ) and a reference model ( $M_0$ ) that treats all mismatches as error calls. The major difference in RePlow is that replicated data are considered simultaneously for the calculation of probabilities. For a genomic position  $i$  with  $k$  replicates, we denote the total number of reads (sequencing depth) of replicate  $j$  as  $n_j^i$  and the number of reads with variant alleles as  $b_j^i$ . VAFs of the  $i$ -th position from replicate  $j$ ,  $x_j^i$ , can be calculated as  $b_j^i/n_j^i$ .

Given observations from position  $i$ , the log ratio ( $S^i$ ) of probability for both models is defined as:

$$S^i = \log \left( \frac{\prod_{j=1}^k P(M_v | x_j^i)}{\prod_{j=1}^k P(M_0 | x_j^i)} \right) = \log \left( \frac{\prod_{j=1}^k P(M_v) P(x_j^i | M_v)}{\prod_{j=1}^k P(M_0) P(x_j^i | M_0)} \right)$$

We assume that all replicates share the identical set of true mutations. Based on this assumption, if the  $i$ -th position of one replicate is assumed to be mutated, the rest should also be mutated and thus their prior probabilities will be 1. Therefore, prior probability will be applied once, regardless of the number of replicates, and the above equation can be rewritten as follows:

$$S^i = \log \left( \frac{P(M_v) \prod_{j=1}^k P(x_j^i | M_v)}{P(M_0) \prod_{j=1}^k P(x_j^i | M_0)} \right)$$

Since  $P(M_v)$  and  $P(M_0)$  are prior probabilities of being mutated or not for a given position, summation of those values should be 1. If we can estimate each value of  $S_i$ — $P(M_v)$ ,  $P(x_j^i | M_v)$ ,  $P(M_0)$ , and  $P(x_j^i | M_0)$ —for all genomic sites, variant candidates can be determined by selecting genomic positions with  $S^i > 0$ . In other words, observed positions that are more likely to be explained by somatic variants than error calls will be selected as variant candidates. To achieve this, we carefully designed both probability models  $M_v$  and  $M_0$  with unique features that have not been considered by conventional callers.

### Error model estimation

A reference model  $M_0$  supposes that all mismatches of a given position are generated by errors. Previous methods have generally estimated the probability of being an error according to base quality scores of observed mismatches. However, we argue that such an approach is inappropriate, depending on the source of error. We classified errors as one of two types, background errors and



sequencing errors, based on the experimental step at which they occur (Fig. 2a). Since mismatches caused by background error do not affect their base call quality, most previous callers have generated false positives at the position with background errors due to the high base quality scores of mismatched bases. Thus, we designed a new model to enable estimation of the probability of being a *background error* for a given observation. We first constructed VAF profiles of background errors to verify their distribution and then fit a parametric distribution to utilize corresponding distribution functions.

To construct VAF profiles of background errors, we collected all genomic positions that possess non-reference alleles and estimated the expected count of background errors for each site. Positions that were called by GATK or commonly called by MuTect for all replicates were excluded, which are highly expected as actual germline or somatic variants. By definition, the expected count of a *sequencing error* can be inferred from the base quality scores of variant alleles. Denoting the base quality score (Phred-scale) of read  $l$  at the genomic position  $i$  by  $q_l^i$ , the expected count of sequencing errors for

replicate  $j$ ,  $b_{SE}^i$ , can be calculated as  $\sum_{l=1}^{b_j^i} 10^{-\frac{q_l^i}{10}}$ . Then, the expected count of background error  $b_{BE}^i$  can

be calculated by subtracting  $b_{SE}^i$  from the number of reads with the variant allele  $b_j^i$  based on our assumption, which is that a given mismatch from a non-variant site should either be from a sequencing or background error. We defined this discrepancy as the mismatch over-representation score (MOS), which represents an unexplained amount of mismatches by base-call quality (sequencing error).

$$MOS_j^i = b_{BE}^i = b_j^i - b_{SE}^i = b_j^i - \sum_{l=1}^{b_j^i} 10^{-\frac{q_l^i}{10}}$$

The number of positions with  $b_{BE}^i > 0$  are regarded as the number of positions that possesses mismatches caused by a background error. The ratio of positions with  $b_{BE}^i > 0$  over total the target region,  $f_{BE}$ , represents the estimated probability that a given position would have a background error. The probability that a given position would have a somatic variant,  $f_v$ , is the only parameter that has

to be supplied by the user for the RePlow model. The default value is provided as  $3 \times 10^{-6}$ , which is a typical mutation frequency commonly used in previous methods<sup>19</sup>. Since  $P(M_v)$  and  $P(M_0)$  from variant detection models are prior probabilities of being mutated or not (being error) for a given mismatch-containing site, the relative ratio of  $f_v$  and  $f_{BE}$  are used as  $P(M_v)$  and  $P(M_0)$  for  $S^i$  calculation.

$$P(M_v) = \phi_v = \frac{f_v}{f_v + f_{BE}}, \quad P(M_0) = \phi_{BE} = \frac{f_{BE}}{f_v + f_{BE}}, \quad \phi_v + \phi_{BE} = 1$$

For every site with  $b_{BE}^i > 0$ , the adjusted VAF  $x_{BE}^i$  is then calculated as  $b_{BE}^i/n^i$  and is used to fit the distribution function. Exponential distribution is chosen to be fit, based on the observed shape of the empirical cumulative distribution function. Maximum-likelihood estimation for the parameter of exponential distribution  $\lambda_{BE}$  is computed by the `fitdistr` package in R. Based on the estimated parameter, the likelihood of a given observation for the  $M_0$  model can be calculated as:

$$P(x_{BE}^i | M_0) = \text{Exp}(x_{BE}^i; \lambda_{BE})$$

Note that estimated parameter  $\lambda_{BE}$  has different values for each substitution type in a single data set: depending on the sequencing platform, distributions of background errors differ greatly between substitution types. Therefore, RePlow separately performs error model estimation for every six substitution type (A>C, A>G, A>T, C>A, C>G, and C>T) and uses the corresponding value of  $\lambda_{BE}$  for a given observation.

### *Variant model estimation*

The likelihood of  $M_v$  is estimated using a binomial distribution. Since we assume that all replicates hold the same somatic variants, concordant VAFs are expected to be observed at the mutated site. On the other hand, errors would hardly show identical VAFs between replicates. We devised a model to reflect this VAF concordance to discriminate true variants from error calls. The mean value of  $x_{BE}^i$  for all replicates is used for the success probability of a binomial trial, giving a high probability only if concordant VAFs are observed between replicates.

$$\hat{\mu}_{BE}^i = \sum_{j=1}^k \frac{x_{BEj}^i}{k}$$

For each observation,  $n_j^i$  and  $b_{BEj}^i$  are considered as the number of trials and the number of successes, respectively. Therefore, the probability of each observation can be calculated by a binomial distribution with the estimated success probability.

$$P(b_{BEj}^i | M_v) = B(b_{BEj}^i; n_j^i, \hat{\mu}_{BE}^i)$$

Since  $b_{BEj}^i$  can be a non-integer value, the likelihood is estimated through normal approximation of a binomial distribution ( $B(n_j^i, \hat{\mu}_{BE}^i) \sim N(n_j^i \hat{\mu}_{BE}^i, n_j^i \hat{\mu}_{BE}^i (1 - \hat{\mu}_{BE}^i))$ ). Then, the observed VAF  $x_{BEj}^i$  will also follow a normal distribution, which is weighted by  $1/n_j^i$  from the approximated distribution for  $b_{BEj}^i$ :

$$x_{BEj}^i \sim N(\hat{\mu}_{BE}^i, \frac{\hat{\mu}_{BE}^i (1 - \hat{\mu}_{BE}^i)}{n_j^i})$$

Hence, the likelihood of a given VAF observation from the  $M_v$  model can be calculated as:

$$P(x_{BEj}^i | M_v) = N(x_{BEj}^i; \hat{\mu}_{BE}^i, \hat{\sigma}_{BE}^{i^2}), \quad \hat{\sigma}_{BE}^i = \sqrt{\frac{\hat{\mu}_{BE}^i (1 - \hat{\mu}_{BE}^i)}{n_j^i}}$$

Overall, the log ratio of the probabilities for  $M_v$  and  $M_0$  is calculated as described below, and positions with  $S^i > 0$  are called as variant candidates.

$$S^i = \log \left( \frac{\phi_v \prod_{j=1}^k N(x_{BEj}^i; \hat{\mu}_{BE}^i, \hat{\sigma}_{BE}^{i^2})}{\phi_{BE} \prod_{j=1}^k \text{Exp}(x_{BEj}^i; \lambda_{BE})} \right)$$

## Assessment of performance with replicates

Since no systematic method has been established to utilize replicates for variant detection, the most straightforward approaches (intersection, union, and BAM merge) were tested to evaluate the

accuracy thereof. For samples A and B (0.5% and 1% VAFs), intersection and union sets of MuTect positive calls (calls with KEEP judgment) were tested for their performances on all platforms.

Likewise, merged BAMs of replicates were analyzed by MuTect, and their positive calls were tested and compared. Conflict calls at the same position were discarded from intersection sets.

Performance tests with RePlow and primitive approaches were achieved in all combinations of library triplicates ( $X_{11}X_{21}$ ,  $X_{21}X_{31}$ ,  $X_{11}X_{31}$ , and  $X_{11}X_{21}X_{31}$ ) for every depth and platform. Average values with 95% confidence intervals are reported for the results with replicates.

All RePlow results in this article were obtained with the default parameter settings, regardless of sequencing platform. However, as a result of creating an excessive number of true mutations in the test-base data set, compared to the sizes of target regions, mutation rates were far beyond ordinary values ( $8.05 \times 10^{-3}$ ,  $8.60 \times 10^{-3}$ , and  $4.83 \times 10^{-3}$  for Illumina-HC, Illumina-amplicon, and Ion Torrent-amplicon, respectively). Due to this intrinsic bias of mixture data, applying a typical mutation rate ( $3 \times 10^{-6}$ ) to RePlow severely underestimated the amount of true mutations. Therefore, we used actual mutation rates for performance tests to avoid such unrealistic distortions. We also applied actual mutation rates to MuTect for primitive approaches, although it worsened the overall accuracy by generating a larger number of false positives. We, thus, reported their results with the default parameter settings, which showed better performances. Despite the underestimation, RePlow showed the best overall performance with typical mutation rates, reflected in the extraordinarily low number of false positives (Supplementary Fig. 10).

To test performance in a multi-platform context, only the data sets with the highest depth of each platform were used (1,000x for ILH and 10,000x for ILA and ITA). Due to differences in the designed targets between sequencing platforms, only overlapping regions were considered in the evaluation. Target regions and the answer set of true mutations were adjusted to each platform pair. As a result, 510, 483, and 500 true variants were selected for the answer set of ILHxILA, ILHxITA, and ILAxITA pairs. The performance of each method was measured for all nine combinations of library replicates from  $X_{y_{11}}X_{z_{11}}$  to  $X_{y_{31}}X_{z_{31}}$ . Average values with 95% confidence intervals are reported as above.

For independent validation, Tru-Q7 reference standard (1.3% Tier, HD734, Horizon Dx, Cambridge, UK) was prepared and sequenced by ILH and ITA with the target coverages of 1,000x and 10,000x, respectively. Two commercial cancer panels (SureSelect custom panel and Ion AmpliSeq cancer hotspot panel v2) that cover 83 and 50 cancer genes were used to mimic common experimental data. 35 cancer hotspot SNVs covered by both panels were selected as an answer set of true mutations. Library triplicates were made and sequenced for each platform, and performance tests were carried out for all combinations of triplicates as stated above. To verify the performance under the same conditions as in the actual analysis, a default mutation rate ( $3 \times 10^{-6}$ ) was applied for all methods in the independent validation. Information on the selected hotspot mutations and observed allele frequencies in each replicate are listed in Supplementary Table 3.



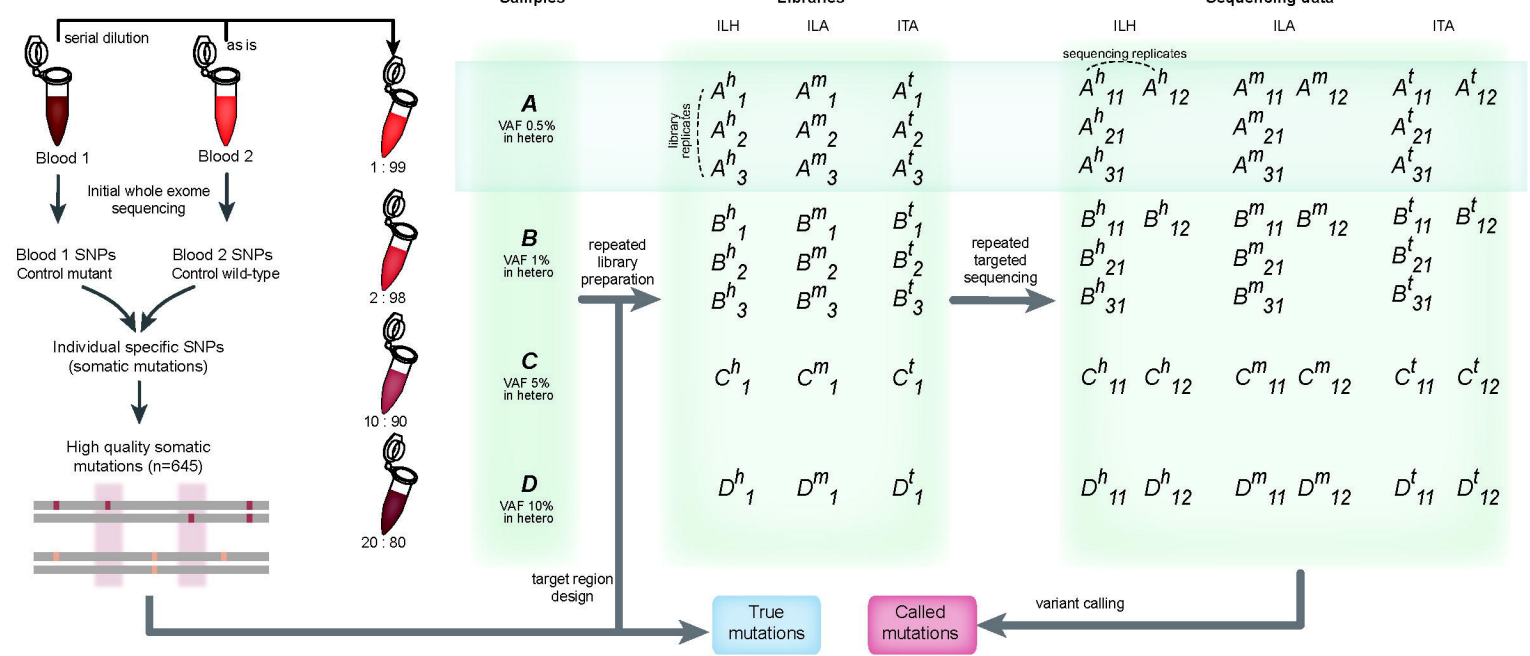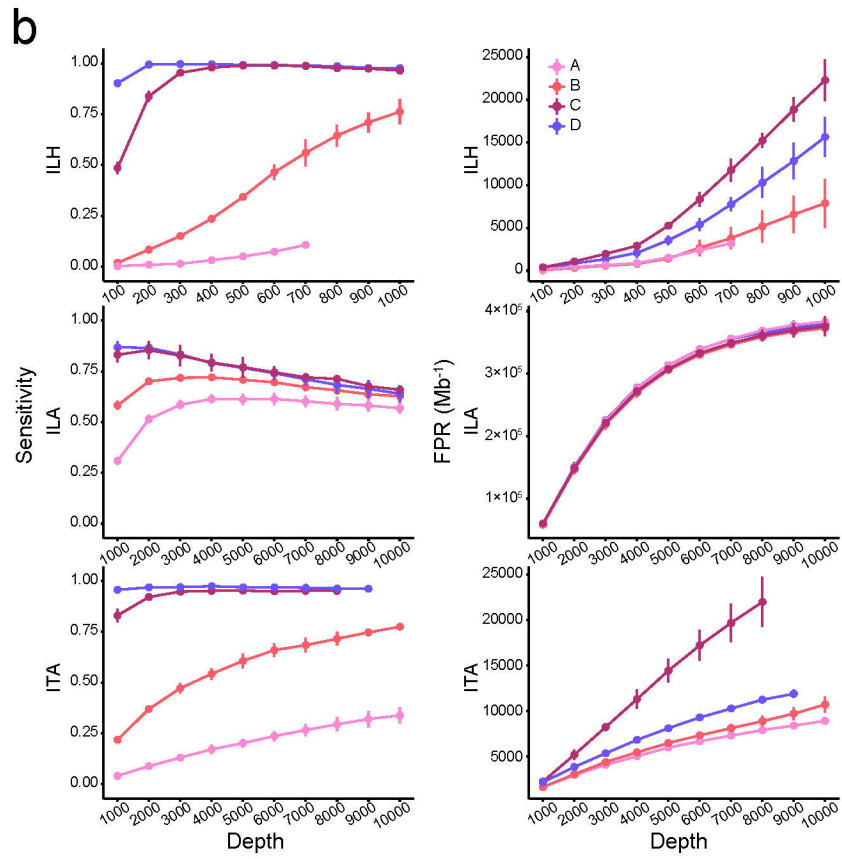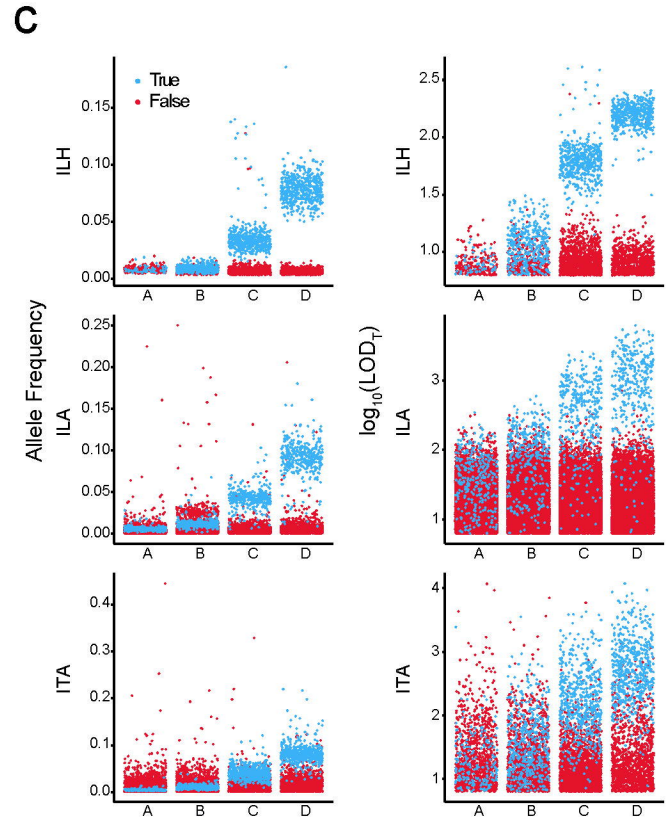

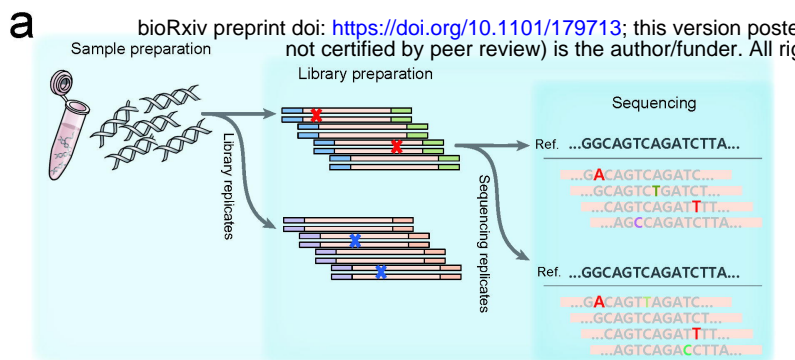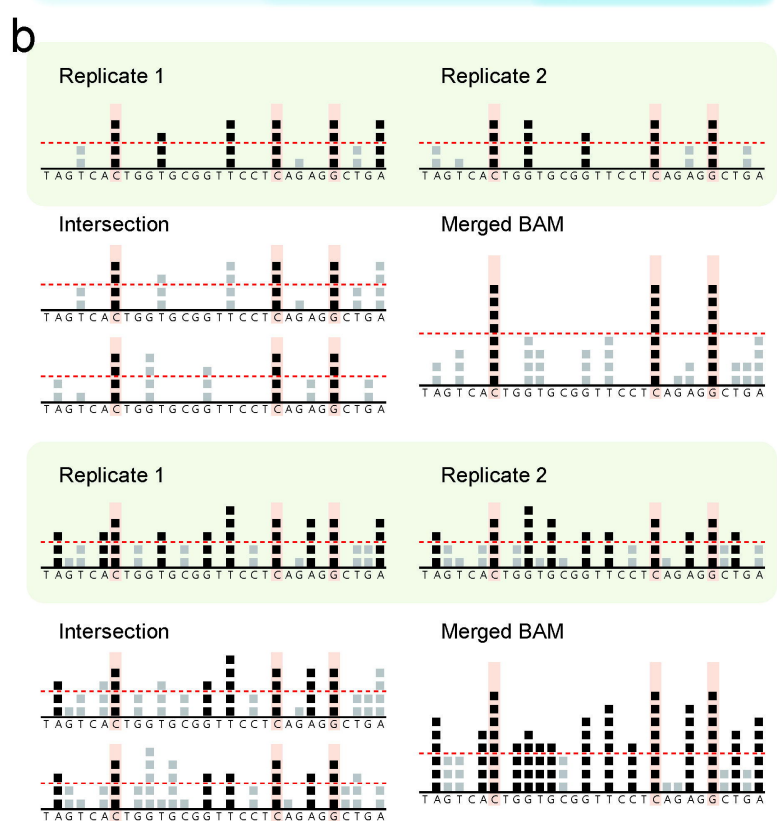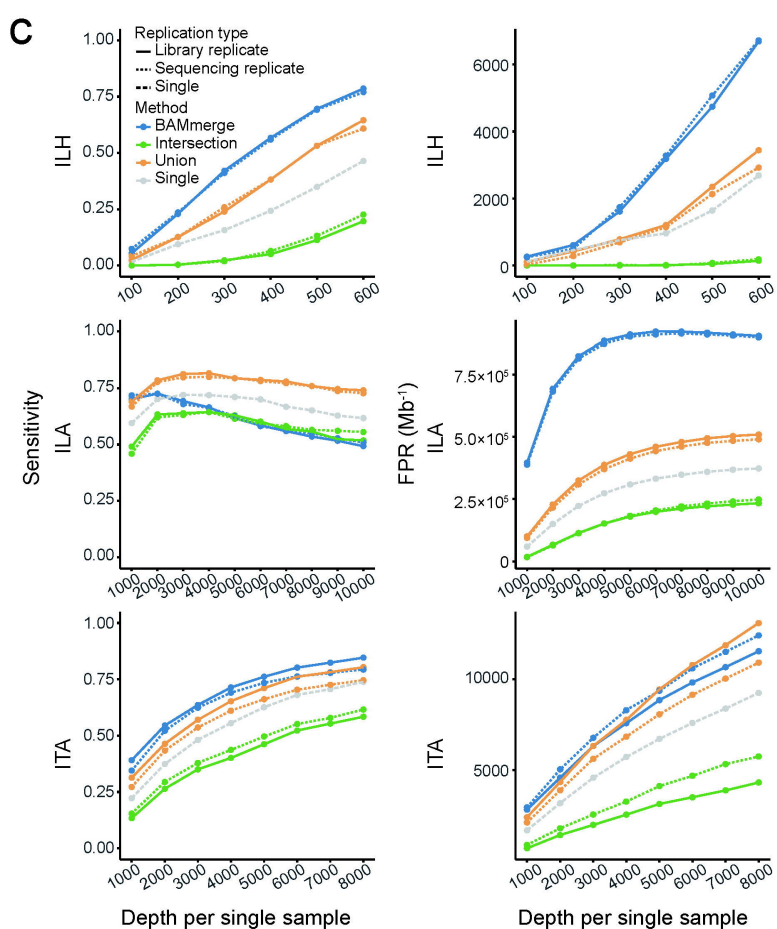

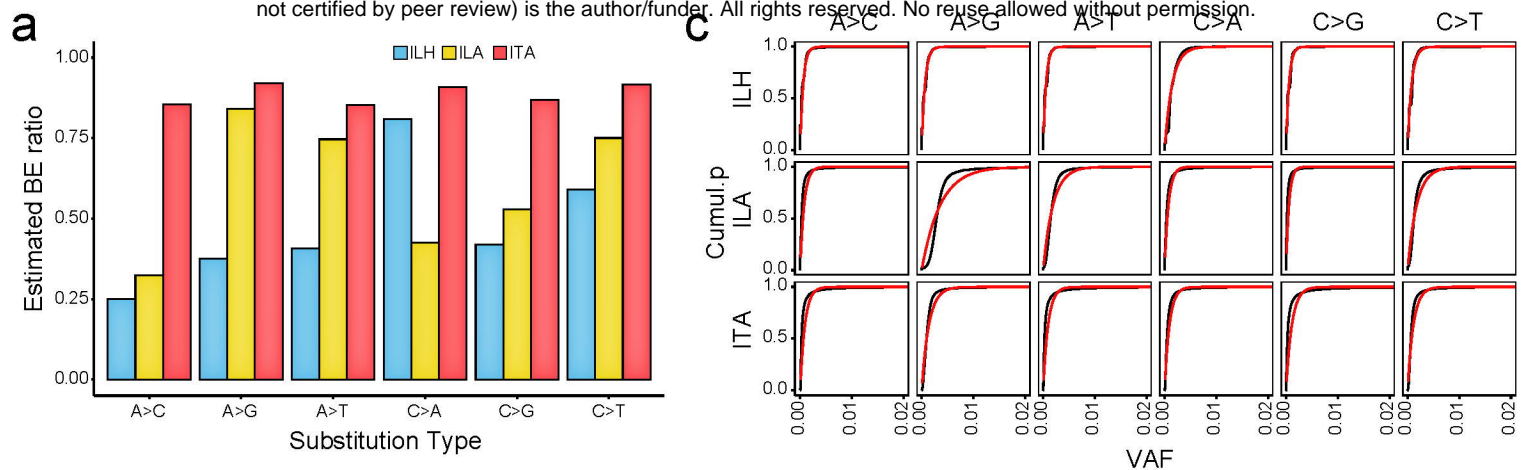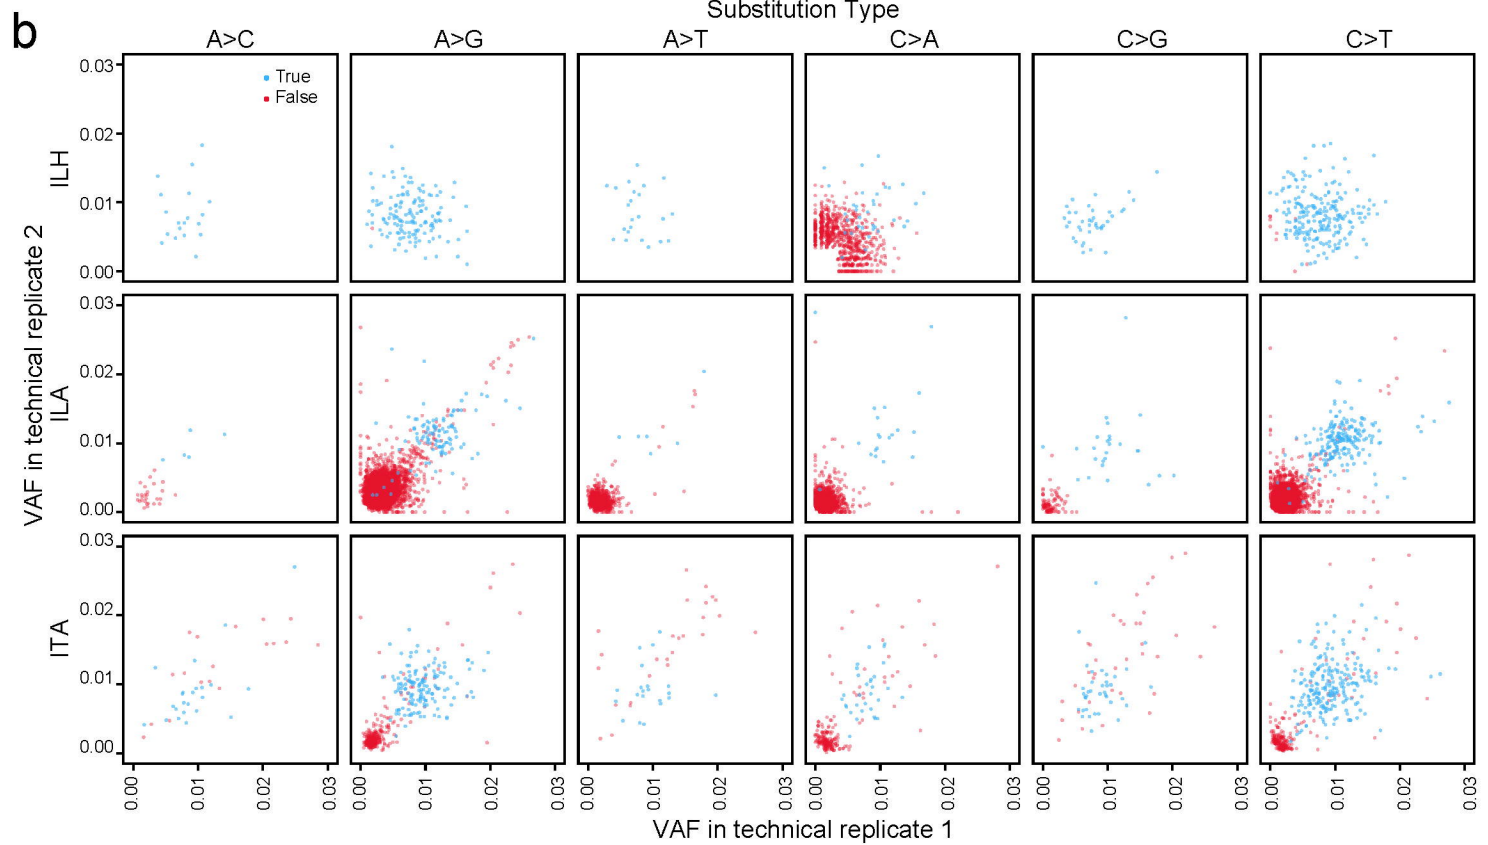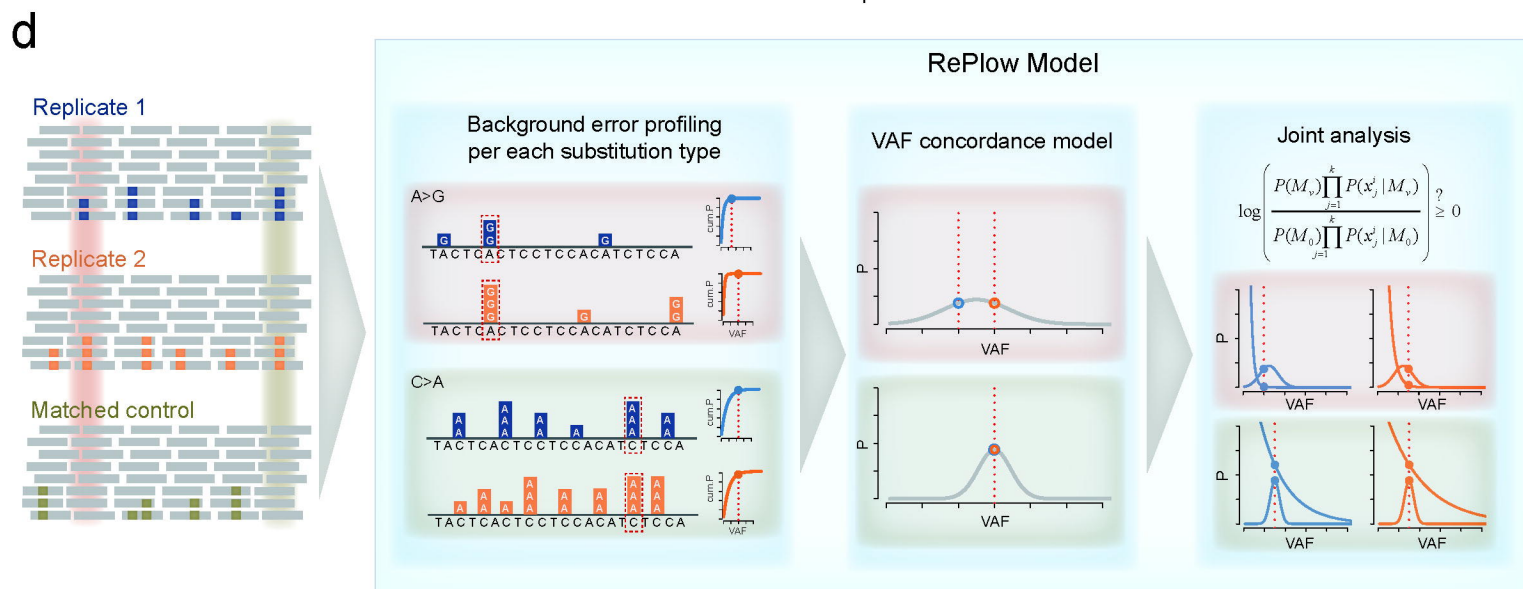



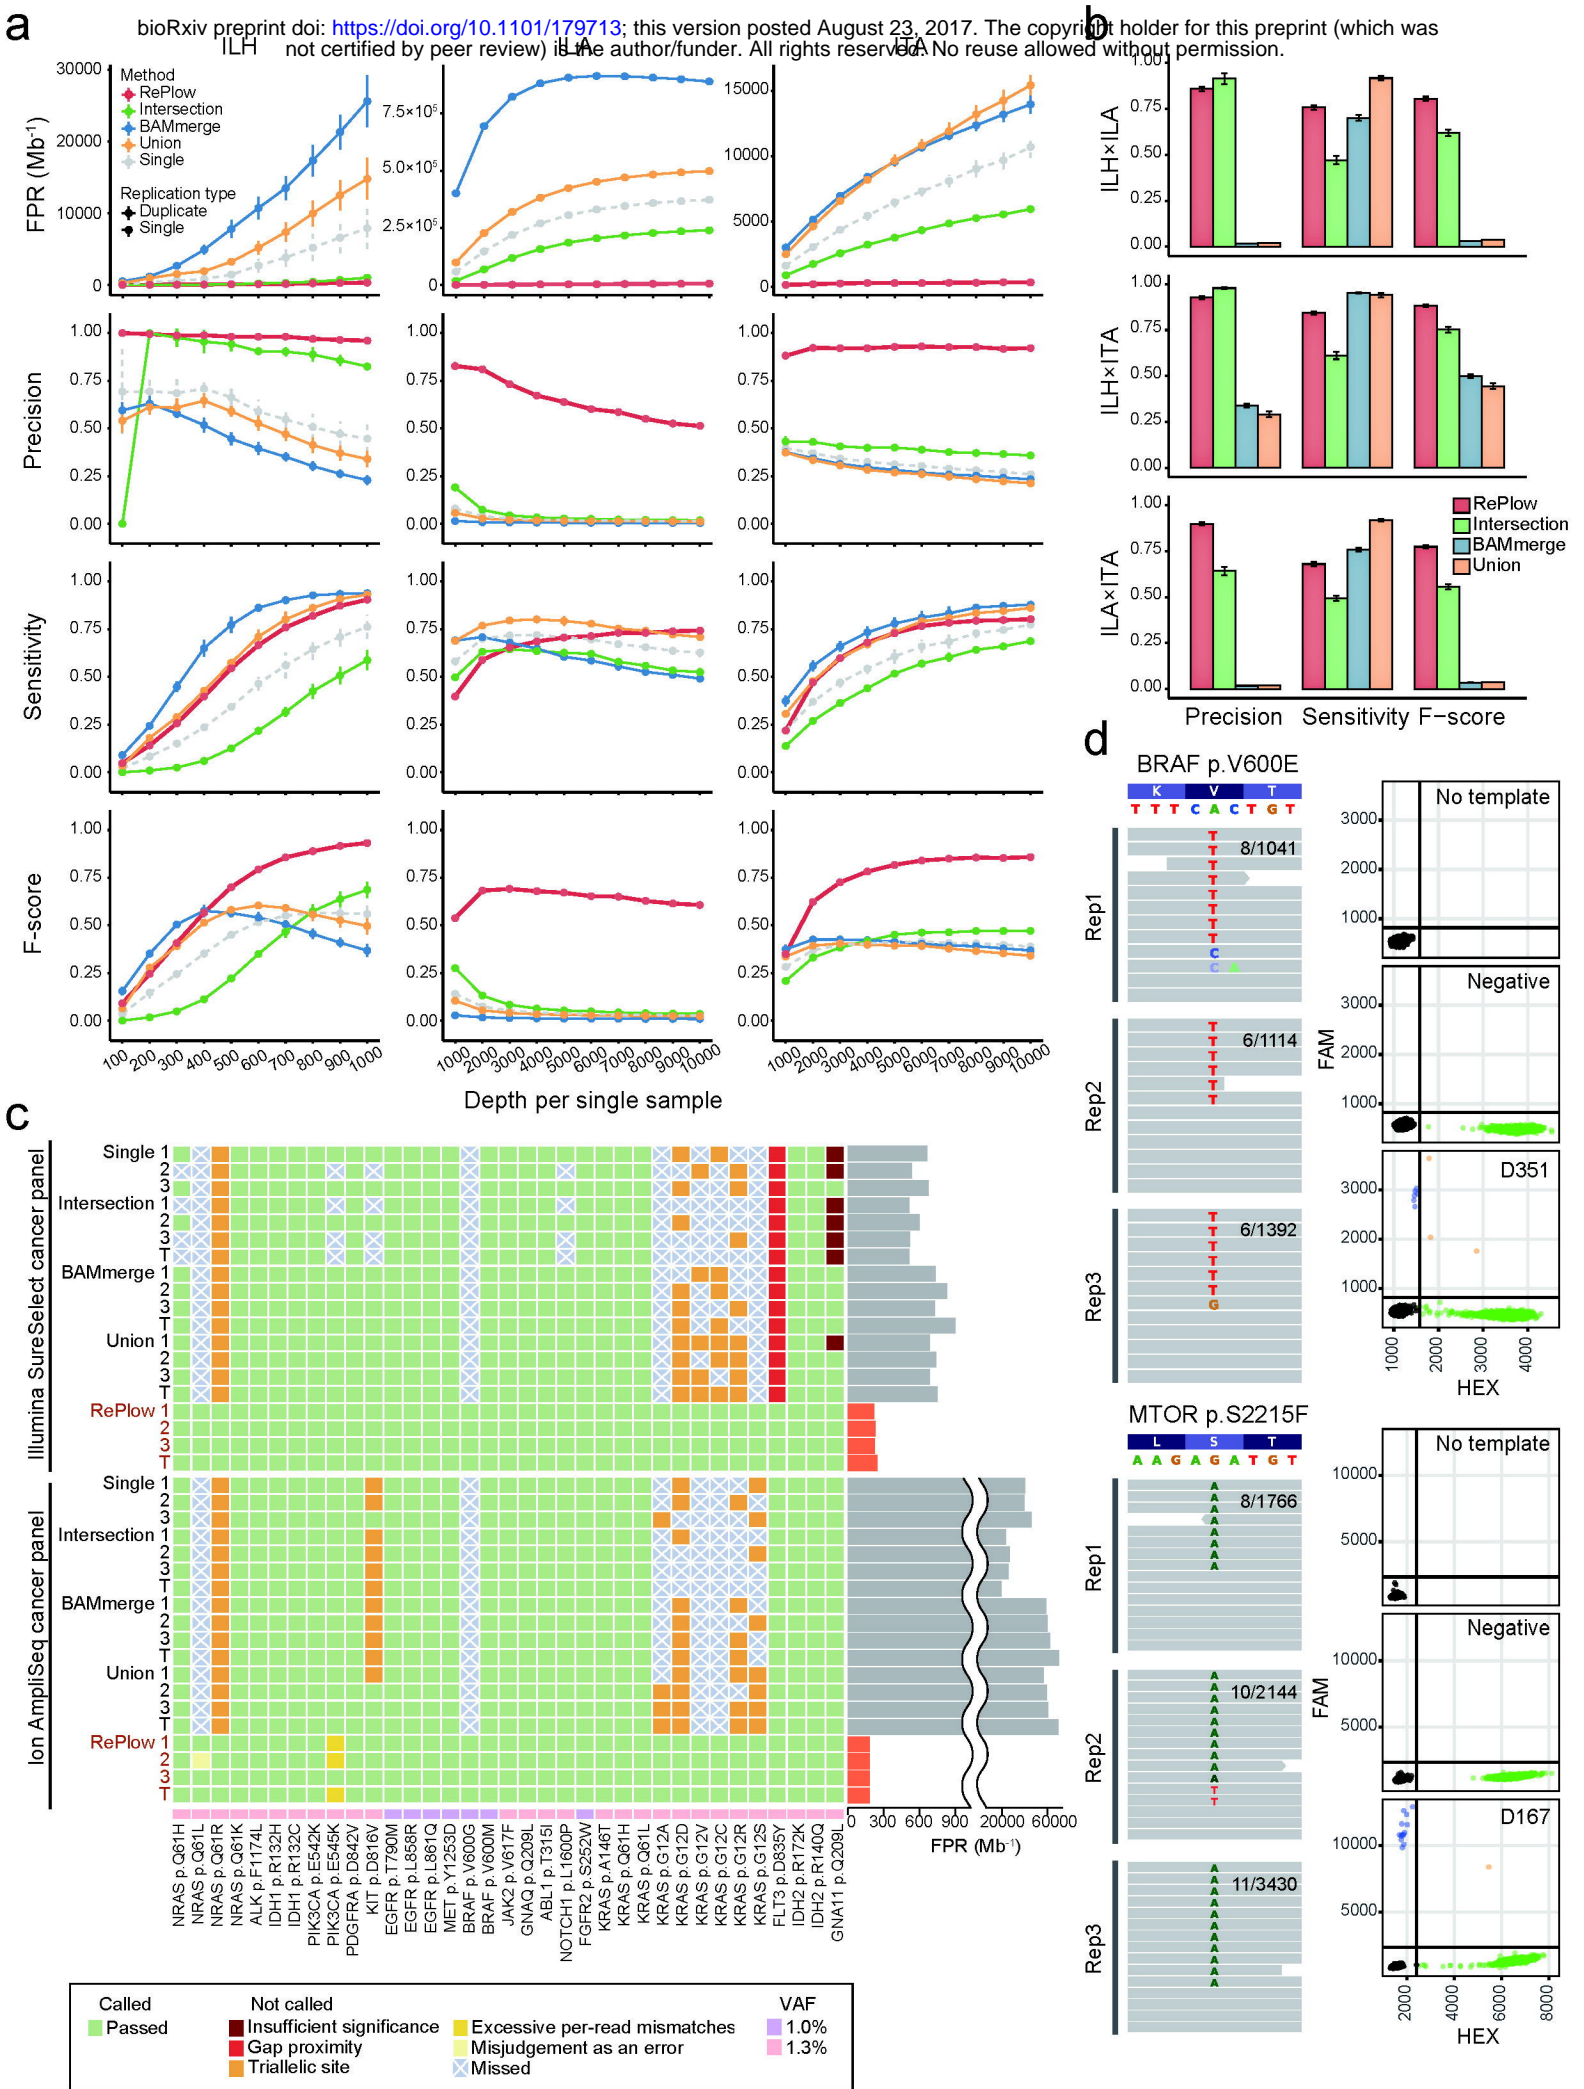

Source: http://biorxiv.org/content/10.1101/179713v1.full.pdf
